# Supplementary material for: A Pooled Analysis of Data Comparing Sirolimus-Eluting Stents with Bare-Metal Stents
Source: Atypon-hosted journal article supplement (doi:10.1056/nejmoa066633), 2007-02-13
Supplement: nejmoa066633sa1.pdf [file nejmoa066633sa1.pdf]

## Supplementary Appendix

This appendix has been provided by the authors to give readers additional information about their work.

Supplement to: Spaulding C, Daemen J, Boersma E, Cutlip DE, Serruys PW. A pooled analysis of data comparing sirolimus-eluting stents with bare-metal stents. *N Engl J Med* 2007;356:989-97.

## Online Supplementary Appendix

### Death narratives and stent thrombosis adjudication; subgroup analyses; and event rates in patients with and without diabetes mellitus

**Appendix Table 1. Non-cardiovascular causes of death with stent thrombosis adjudication in patients receiving a SES (n=27)**

| Days post procedure | Age at inclusion | Diabetes | Narrative                       | Stent thrombosis adjudication according to the ARC definitions |
|---------------------|------------------|----------|---------------------------------|----------------------------------------------------------------|
| 91                  | 84               | No       | Intracranial hemorrhage         | No ST                                                          |
| 127                 | 67               | No       | Metastatic renal cell carcinoma | No ST                                                          |
| 203                 | 79               | Yes      | Septicaemia                     | No ST                                                          |
| 239                 | 73               | No       | Fall; subdural hematoma         | No ST                                                          |
| 277                 | 54               | Yes      | Osteomyelitis post amputation   | No ST                                                          |
| 330                 | 65               | No       | Colon cancer                    | No ST                                                          |
| 333                 | 56               | Yes      | Subarachnoidal hemorrhage       | No ST                                                          |
| 388                 | 77               | No       | Cerebral vascular accident      | No ST                                                          |
| 438                 | 70               | No       | Metastatic lung cancer          | No ST                                                          |

|      |    |     |                                               |       |
|------|----|-----|-----------------------------------------------|-------|
| 467  | 70 | No  | Chronic lung disease,<br>pneumonia            | No ST |
| 524  | 69 | No  | Cerebrovascular accident                      | No ST |
| 572  | 65 | Yes | Respiratory failure                           | No ST |
| 596  | 67 | No  | Metastatic prostate<br>carcinoma              | No ST |
| 601  | 81 | No  | End stage chronic lung<br>disease             | No ST |
| 619  | 69 | No  | Metastatic lung cancer                        | No ST |
| 723  | 54 | Yes | Car accident                                  | No ST |
| 786  | 79 | No  | End stage chronic lung<br>disease             | No ST |
| 855  | 78 | No  | Metastatic oropharynx<br>epidermoid carcinoma | No ST |
| 982  | 70 | No  | Dementia, seizure disorder                    | No ST |
| 1054 | 73 | No  | Pulmonary infection                           | No ST |
| 1122 | 74 | Yes | Lymphoma                                      | No ST |
| 1261 | 74 | Yes | Pancreatic cancer                             | No ST |
| 1299 | 54 | No  | Lung cancer                                   | No ST |
| 1309 | 77 | Yes | Respiratory failure                           | No ST |
| 1368 | 75 | No  | Respiratory failure                           | No ST |
| 1435 | 71 | No  | Renal cell carcinoma                          | No ST |
| 1439 | 51 | No  | Colon carcinoma                               | No ST |

**Appendix Table 2. Non-cardiovascular causes of death with stent thrombosis adjudication in patients receiving a BMS (n=23)**

| <b>Days post procedure</b> | <b>Age at inclusion</b> | <b>Diabetes</b> | <b>Narrative</b>                                                                                                                                           | <b>Stent thrombosis adjudication according to the ARC definitions</b> |
|----------------------------|-------------------------|-----------------|------------------------------------------------------------------------------------------------------------------------------------------------------------|-----------------------------------------------------------------------|
| 52                         | 70                      | No              | Metastatic lung cancer                                                                                                                                     | No ST                                                                 |
| 168                        | 71                      | No              | Bleeding from a gastric ulcer                                                                                                                              | No ST                                                                 |
| 306                        | 53                      | Yes             | Lung cancer                                                                                                                                                | No ST                                                                 |
| 369                        | 81                      | No              | Lung cancer                                                                                                                                                | No ST                                                                 |
| 558                        | 65                      | No              | Multiple myeloma                                                                                                                                           | No ST                                                                 |
| 624                        | 64                      | No              | Glioblastoma multiforme                                                                                                                                    | No ST                                                                 |
| 758                        | 70                      | No              | Pancreatic cancer                                                                                                                                          | No ST                                                                 |
| 766                        | 56                      | No              | Gastric cancer                                                                                                                                             | No ST                                                                 |
| 789                        | 67                      | No              | Intracranial hemorrhage                                                                                                                                    | No ST                                                                 |
| 818                        | 77                      | No              | Stent thrombosis after stopping aspirin and clopidogrel for upper gastrointestinal bleeding at 278 days. Ischemic bowel with perforation as cause of death | Definite ST                                                           |
| 862                        | 67                      | Yes             | Cerebrovascular accident                                                                                                                                   | No ST                                                                 |
| 973                        | 54                      | No              | Perforation of gastric ulcer                                                                                                                               | No ST                                                                 |
| 1091                       | 88                      | No              | Skin cancer with metastases                                                                                                                                | No ST                                                                 |
| 1142                       | 83                      | No              | Progressive dementia, urosepsis                                                                                                                            | No ST                                                                 |
| 1167                       | 52                      | No              | Brain tumor                                                                                                                                                | No ST                                                                 |
| 1200                       | 78                      | No              | Perforated peptic ulcer and upper gastrointestinal bleeding                                                                                                | No ST                                                                 |
| 1250                       | 77                      | Yes             | Pneumothorax                                                                                                                                               | No ST                                                                 |
| 1253                       | 84                      | No              | Hip surgery with post-operative                                                                                                                            | No ST                                                                 |

|      |    |     |                                         |       |
|------|----|-----|-----------------------------------------|-------|
|      |    |     | complications ; autopsy negative for ST |       |
| 1290 | 89 | No  | Pneumonia                               | No ST |
| 1323 | 68 | No  | Metastatic lung cancer                  | No ST |
| 1358 | 71 | No  | Lymphoma                                | No ST |
| 1367 | 71 | Yes | Urinary tract infection - sepsis        | No ST |
| 1427 | 74 | No  | Metastatic lung cancer                  | No ST |

**Appendix Table 3. Cardiovascular causes of death with stent thrombosis adjudication in patients receiving a SES (n=30)**

| <b>Days post procedure</b> | <b>Age at inclusion</b> | <b>Diabetes</b> | <b>Narrative</b>                                                                                                                                                                                                                                                                                       | <b>Stent thrombosis adjudication according to the ARC definitions</b> |
|----------------------------|-------------------------|-----------------|--------------------------------------------------------------------------------------------------------------------------------------------------------------------------------------------------------------------------------------------------------------------------------------------------------|-----------------------------------------------------------------------|
| 1                          | 53                      | Yes             | Post procedure intracerebral hemorrhage                                                                                                                                                                                                                                                                | No ST                                                                 |
| 167                        | 80                      | No              | A repeat angiography performed 167 days post-procedure found no restenosis at the site of the target lesion on the LAD. During the procedure, an intracoronary ultrasound was performed. Occlusive dissection appeared on the LAD. PTCA was performed, acute MI and death occurred after the procedure | No ST                                                                 |
| 198                        | 83                      | No              | Possible intake of benzodiazepines, urinary tract infection, liver dysfunction, renal failure pneumonia and heart failure                                                                                                                                                                              | No ST                                                                 |
| 299                        | 74                      | No              | Out of hospital cardiac arrest. No autopsy performed                                                                                                                                                                                                                                                   | Possible ST                                                           |
| 465                        | 70                      | Yes             | The patient was reported as having acute shortage of breath and died shortly after. No autopsy was                                                                                                                                                                                                     | Possible ST                                                           |

|     |    |     |                                                                                                                                                                                                                                      |             |
|-----|----|-----|--------------------------------------------------------------------------------------------------------------------------------------------------------------------------------------------------------------------------------------|-------------|
|     |    |     | performed.                                                                                                                                                                                                                           |             |
| 542 | 57 | No  | A non-Q wave MI occurred 539 days after the index procedure. An angiogram was performed 542 days post-procedure and showed an occluded target lesion.<br><br>An attempt to open the occlusion failed. Death occurred on the same day | Definite ST |
| 545 | 65 | Yes | The patient complained of chest pain and sustained an out of hospital cardiac arrest. An autopsy was not performed.                                                                                                                  | Possible ST |
| 702 | 65 | No  | Out of hospital cardiac arrest. The patient was transported to a hospital by an emergency medical team and pronounced dead at arrival. An autopsy was not performed.                                                                 | Possible ST |
| 734 | 73 | Yes | When the patient's referring physician was contacted for 3 year follow-up, the physician reported the patient had expired in 2003. No autopsy was performed.                                                                         | Possible ST |
| 759 | 68 | Yes | Found dead in her car with no obvious injuries. An autopsy was not performed.                                                                                                                                                        | Possible ST |
| 776 | 67 | No  | Complications of coronary artery bypass surgery for performed for progression of coronary artery disease.                                                                                                                            | No ST       |
| 800 | 80 | Yes | Patient found dead at home. An autopsy was not performed                                                                                                                                                                             | Possible ST |
| 802 | 67 | No  | Stent thrombosis with acute myocardial infarction and cardiogenic shock                                                                                                                                                              | Definite ST |
| 806 | 88 | No  | The patient was admitted to an outlying facility for a cerebrovascular accident. During the hospital stay he experienced a Q-wave MI which was not properly                                                                          | Possible ST |

|      |    |     |                                                                                                                                                                                                                                                                                                                                                                                                                                                                                                                                                                                                   |             |
|------|----|-----|---------------------------------------------------------------------------------------------------------------------------------------------------------------------------------------------------------------------------------------------------------------------------------------------------------------------------------------------------------------------------------------------------------------------------------------------------------------------------------------------------------------------------------------------------------------------------------------------------|-------------|
|      |    |     | documented (no ECG available) and died                                                                                                                                                                                                                                                                                                                                                                                                                                                                                                                                                            |             |
| 823  | 75 | Yes | The patient had revascularization of non-target lesions 23 and 26 months after the index procedure, sustained a MI in the territory of the non-target vessel and died suddenly three weeks after the non-target revascularization procedure.                                                                                                                                                                                                                                                                                                                                                      | No ST       |
| 887  | 80 | Yes | Died at home. The cause of death noted on the death certificate was “sudden death”                                                                                                                                                                                                                                                                                                                                                                                                                                                                                                                | Possible ST |
| 917  | 47 | No  | 10 days after the implantation of the stent on the proximal LAD, the patient suffered a non-Q wave anterior MI. Thrombolytic therapy was given in another site and the patient was transferred. 10 days after the non-Q wave infarction, a coronary angiogram revealed a patent stent and a 40-50% stenosis downstream. PCI was performed on the mid-LAD. A cerebro-vascular accident occurred 104 days after the index procedure. No-Q waves were reported 653 and 711 days post-procedure. Repeat catheterization was not performed. The patient died of heart failure 917 days post-procedure. | Probable ST |
| 961  | 71 | Yes | Heart failure, arrhythmia, kidney failure and septicemia                                                                                                                                                                                                                                                                                                                                                                                                                                                                                                                                          | No ST       |
| 1074 | 73 | Yes | Found unresponsive at home and resuscitation attempts were unsuccessful. An autopsy was not performed                                                                                                                                                                                                                                                                                                                                                                                                                                                                                             | Possible ST |
| 1085 | 79 | No  | Found dead at home. An autopsy was not performed                                                                                                                                                                                                                                                                                                                                                                                                                                                                                                                                                  | Possible ST |
| 1086 | 52 | No  | Died at home. No information on the cause of death available. An autopsy was not performed                                                                                                                                                                                                                                                                                                                                                                                                                                                                                                        | Possible ST |

|      |    |     |                                                                                                                                                                                                                                                            |             |
|------|----|-----|------------------------------------------------------------------------------------------------------------------------------------------------------------------------------------------------------------------------------------------------------------|-------------|
| 1133 | 92 | No  | Progressive heart failure                                                                                                                                                                                                                                  | No ST       |
| 1179 | 66 | No  | The clinical site reported that during a review of the hospital computer system it was discovered that the patient was recorded as dead. A death certificate was not available, and the clinical site confirmed that no further data would be forthcoming. | Possible ST |
| 1234 | 68 | No  | Dementia and progressive heart failure                                                                                                                                                                                                                     | No ST       |
| 1300 | 80 | Yes | The patient expired at home. The Death Form and Death Certificate noted that the cause of death was an acute myocardial infarction. No autopsy was performed.                                                                                              | Possible ST |
| 1313 | 54 | Yes | At the time of the four year follow-up contact, the investigational site discovered via the national social security registry that the patient had died. No further information was obtained.                                                              | Possible ST |
| 1376 | 70 | No  | Prosthetic valve endocarditis                                                                                                                                                                                                                              | No ST       |
| 1389 | 68 | Yes | Heart Failure                                                                                                                                                                                                                                              | No ST       |
| 1416 | 64 | Yes | The patient was admitted to the coronary care unit because of acute shortage of breath, intubated on arrival and died shortly after. No autopsy was performed.                                                                                             | Possible ST |
| 1428 | 67 | Yes | Heart failure – bilateral pneumonia                                                                                                                                                                                                                        | No ST       |

**Appendix Table 4. Cardiovascular causes of death with stent thrombosis adjudication in patients receiving a BMS (n=23)**

| <b>Days post procedure</b> | <b>Age at admission</b> | <b>Diabetes</b> | <b>Narrative</b>                                                                                                           | <b>Stent thrombosis adjudication according to the ARC definition</b> |
|----------------------------|-------------------------|-----------------|----------------------------------------------------------------------------------------------------------------------------|----------------------------------------------------------------------|
| 30                         | 79                      | No              | Sudden death at home. An autopsy was not performed                                                                         | Probable ST                                                          |
| 45                         | 62                      | Yes             | The patient died during a trip to a foreign country. The exact cause of death is unknown.                                  | Possible ST                                                          |
| 97                         | 57                      | No              | Out of hospital cardiac arrest. An autopsy was not performed                                                               | Possible ST                                                          |
| 140                        | 54                      | Yes             | Patient found dead at home. No resuscitation was attempted. An autopsy was not performed.                                  | Possible ST                                                          |
| 517                        | 73                      | No              | Felt suddenly sick, went to bed and was found shortly after in deep coma and died. An autopsy was not performed            | Possible ST                                                          |
| 553                        | 69                      | No              | Restenosis. Died of complications of coronary artery bypass surgery.                                                       | No ST                                                                |
| 574                        | 62                      | No              | The patient was found lying face down next to a capsized sailboat. Sudden death was suspected and adjudicated as cardiac.  | Possible ST                                                          |
| 578                        | 69                      | No              | Progressive heart failure and skin malignancy                                                                              | No ST                                                                |
| 613                        | 73                      | Yes             | MI in the territory of the implanted stent 16 days after the procedure. Sudden death at home. An autopsy was not performed | Probable ST                                                          |
| 664                        | 81                      | No              | Progressive heart failure                                                                                                  | No ST                                                                |

|      |    |     |                                                                                                                                                                                                                                                                                    |             |
|------|----|-----|------------------------------------------------------------------------------------------------------------------------------------------------------------------------------------------------------------------------------------------------------------------------------------|-------------|
| 799  | 66 | No  | Died suddenly at home. An autopsy was not performed                                                                                                                                                                                                                                | Possible ST |
| 804  | 50 | No  | At 196 days: occlusive restenosis with no ischemia. PCI failed to reopen the occlusion. Unexplained death at home 804 days after the index procedure.. Since the stent was previously occluded by restenosis, the event was adjudicated as a cardiac death and no stent thrombosis | No ST       |
| 818  | 66 | No  | Sudden death at home. An autopsy showed recent myocardial infarction in the territory of a non target vessel.                                                                                                                                                                      | No ST       |
| 855  | 50 | Yes | PCI of the target lesion was performed 280 and 763 days post-procedure. PCI was also performed on non-target lesions 280, 337 and 659 days post-procedure Sudden death at home occurred 855 days after the index procedure. An autopsy was not performed.                          | Possible ST |
| 942  | 55 | No  | Circumstances of death unknown                                                                                                                                                                                                                                                     | Possible ST |
| 1012 | 80 | No  | Died suddenly at home. An autopsy was not performed                                                                                                                                                                                                                                | Possible ST |
| 1048 | 49 | No  | Circumstances of death unknown. The death certificate mentions previous and acute MI. An autopsy was not performed                                                                                                                                                                 | Possible ST |
| 1067 | 72 | No  | Suddenly felt sick, was taken to a hospital were he died shortly after arrival. An autopsy was not performed                                                                                                                                                                       | Possible ST |
| 1081 | 70 | No  | Rupture of ventricular aneurysm                                                                                                                                                                                                                                                    | No ST       |

|      |    |     |                                                                                                                                                |             |
|------|----|-----|------------------------------------------------------------------------------------------------------------------------------------------------|-------------|
| 1313 | 53 | No  | Found dead in the passenger seat of his car, motor not running, no sign of collision. An autopsy ruled out stent thrombosis                    | No ST       |
| 1381 | 81 | Yes | MI in the territory of the implanted stent 85 days after the procedure. Sudden death 1381 post-procedure. An autopsy was not performed.        | Probable ST |
| 1391 | 66 | Yes | Died suddenly at home. An autopsy was not performed                                                                                            | Possible ST |
| 1404 | 64 | No  | At four years follow-up, the study investigator found her name on a national death registry. The cause and circumstances of death are unknown. | Possible ST |

SES indicated sirolimus-eluting stent, BMS bare metal stent, MI myocardial infarction, ST stent thrombosis, TVR target vessel revascularization, CVA cerebrovascular accident.



Legend for Appendix Figure 1:

**All-cause mortality in selected subgroups.**

Exploratory analyses to evaluate possible heterogeneity in treatment effects on mortality according to the trial of enrolment and the following 10 clinically relevant characteristics: age, sex, diabetes, previous MI, dyslipidemia, hypertension, heart failure, Canadian Cardiovascular Society angina classification, number of diseased vessels and left ventricular ejection fraction. The size of the squares corresponds to the amount of statistical information. For the continuous variables (age and left ventricular ejection fraction), medians were used as cut-off. Results of tests for heterogeneity in treatment effect were considered significant if P was <0.01.

MI=myocardial infarction, CCS= Canadian Cardiovascular Society, LVEF=left ventricular ejection fraction.

**Appendix Table 5. Incidence of death, myocardial infarction and stent thrombosis at four-year follow-up in patients with and without diabetes mellitus**

|                                   | Patients with diabetes mellitus |      |                    |      |                     | Patients without diabetes mellitus |      |                    |      |                     | P for interaction |  |
|-----------------------------------|---------------------------------|------|--------------------|------|---------------------|------------------------------------|------|--------------------|------|---------------------|-------------------|--|
|                                   | Events at 4-year follow-up      |      |                    |      | AdjustedHR (95% CI) | Events at 4-year follow-up         |      |                    |      | AdjustedHR (95% CI) |                   |  |
|                                   | SES (195 patients)              |      | BMS (233 patients) |      |                     | SES (683 patients)                 |      | BMS (635 patients) |      |                     |                   |  |
|                                   | N                               | %    | N                  | %    | N                   | %                                  | N    | %                  |      |                     |                   |  |
| Death                             | 23                              | 12.2 | 10                 | 4.4  | 2.9 (1.38-6.1)      | 34                                 | 5.1  | 36                 | 5.8  | 0.88 (0.55-1.41)    | 0.008             |  |
| Cardiovascular                    | 14                              | 7.7  | 6                  | 2.7  | 3.0 (1.14-7.7)      | 15                                 | 2.3  | 17                 | 2.8  | 0.82 (0.41-1.64)    | 0.033             |  |
| Non-cardiovascular                | 9                               | 4.9  | 4                  | 1.8  | 2.8 (0.87-9.2)      | 19                                 | 2.9  | 19                 | 3.2  | 0.93 (0.49-1.76)    | 0.11              |  |
| Myocardial infarction             | 12                              | 6.5  | 19                 | 8.2  | 0.75 (0.37-1.55)    | 43                                 | 6.4  | 34                 | 5.5  | 1.19 (0.76-1.87)    | 0.29              |  |
| Q wave MI                         | 5                               | 2.7  | 1                  | 0.4  | 6.3 (0.73-54)       | 13                                 | 2.0  | 10                 | 1.6  | 1.22 (0.53-2.8)     | 0.16              |  |
| Non-Q wave MI                     | 7                               | 3.8  | 18                 | 7.8  | 0.46 (0.19-1.11)    | 30                                 | 4.5  | 25                 | 4.0  | 1.13 (0.66-1.91)    | 0.088             |  |
| Death or Q-wave MI                | 26                              | 13.8 | 10                 | 4.4  | 3.3 (1.59-6.9)      | 44                                 | 6.6  | 45                 | 7.3  | 0.91 (0.60-1.39)    | 0.003             |  |
| Death or any MI                   | 31                              | 16.4 | 26                 | 11.3 | 1.43 (0.85-2.4)     | 69                                 | 10.3 | 64                 | 10.3 | 1.01 (0.72-1.42)    | 0.28              |  |
| Thrombosis by Protocol definition |                                 |      |                    |      |                     |                                    |      |                    |      |                     |                   |  |
| Acute ST (within 24 hours)        | 0                               | -    | 0                  | -    | -                   | 0                                  | -    | 0                  | -    | -                   |                   |  |
| Subacute ST (within 1 - 30 days)  | 1                               | 0.5  | 0                  | -    | -                   | 3                                  | 0.4  | 1                  | 0.2  | 2.8 (0.29-27)       | 1.0               |  |
| Late ST (after 30 days)           | 1                               | 0.6  | 1                  | 0.4  | 1.19 (0.07-19)      | 5                                  | 0.8  | 3                  | 0.5  | 1.57 (0.37-6.6)     | 0.86              |  |
| Thrombosis by ARC definitions     |                                 |      |                    |      |                     |                                    |      |                    |      |                     |                   |  |
| Acute ST (within 24 hours)        | 0                               | -    | 0                  | -    | -                   | 0                                  | -    | 0                  | -    | -                   |                   |  |
| Subacute ST (within 1 - 30 days)  | 1                               | 0.5  | 2                  | 0.9  | 0.62 (0.06-6.8)     | 3                                  | 0.4  | 1                  | 0.2  | 2.8 (0.29-27)       | 0.37              |  |
| Late ST (within 30 days - 1 year) | 0                               | -    | 4                  | 1.7  | -                   | 2                                  | 0.3  | 7                  | 1.1  | 0.27 (0.06-1.28)    | 0.99              |  |

|                             |    |     |   |     |                 |    |     |    |     |                  |       |
|-----------------------------|----|-----|---|-----|-----------------|----|-----|----|-----|------------------|-------|
| Very late ST (after 1 year) | 11 | 6.1 | 3 | 1.4 | 4.7 (1.31-17)   | 12 | 1.9 | 11 | 1.8 | 1.02 (0.45-2.3)  | 0.048 |
| Definite ST                 | 2  | 1.1 | 1 | 0.4 | 2.5 (0.22-27)   | 8  | 1.2 | 6  | 1.0 | 1.25 (0.43-3.6)  | 0.62  |
| Definite or probable ST     | 2  | 1.1 | 5 | 2.2 | 0.49 (0.10-2.5) | 11 | 1.7 | 10 | 1.6 | 1.03 (0.44-2.4)  | 0.43  |
| Any ST                      | 12 | 6.6 | 9 | 3.9 | 1.64 (0.70-3.9) | 18 | 2.8 | 19 | 3.1 | 0.88 (0.46-1.68) | 0.26  |

SES indicates sirolimus-eluting stent, BMS bare metal stent, HR hazard ratio, CI confidence interval, MI myocardial infarction, ST stent thrombosis, ARC academic research consortium.
